# Supplementary material for: Practical approach to method verification in plasma and validation in cerebrospinal fluid under accreditation using a flexible scope in molecular virology: setting up the HIV, HBV and HCV Aptima™ Quant Dx assays
Source: publisher site journal article supplement (doi:10.1515/cclm-2019-0502), 2019-09-20
Supplement: Supplementary file 1 [file cclm-2019-0502_suppl.docx]

**Supplemental material**

|  |  | Repeatability | | | IQA | | |
| --- | --- | --- | --- | --- | --- | --- | --- |
|  |  | Number | Mean | CV% | Number | Mean | CV% |
| HIV-1 | High level | 30 | 4.35 | 4.87 | 12 | 5.30 | 4.11 |
| Low level | 30 | 2.22 | 1.71 | 12 | 2.94 | 0.88 |
| HBV | High level | 30 | 4.91 | 1.86 | 15 | 4.59 | 2.46 |
| Low level | 30 | 3.07 | 0.90 | 15 | 2.82 | 2.41 |
| HCV | High level | 30 | 4.14 | 4.12 | 17 | 5.64 | 2.74 |
| Low level | 30 | 2.24 | 1.96 | 17 | 2.34 | 2.17 |

**Table 1:** Data from repeatability and internal quality assessment (IQA) testing for HIV-1, HBV and HCV with Panther® system in the short pre-implementation time. CV: coefficient of variation. All of the CV% conformed with the limit of 0.25 log applicable in our laboratory. The units of the mean were in log copies/mL for HIV-1 parameter and in log IU/mL for HBV and HCV parameters.

|  | HIV-1 plasma  (log copies/mL) | | HIV-1 CSF  (log copies/mL) | | HBV  (log IU/mL) | | HCV  (log IU/mL) | |
| --- | --- | --- | --- | --- | --- | --- | --- | --- |
| MU | Low level | High level | Low level | High level | Low level | High level | Low level | High level |
| Pre-implementation | 0.12 | 0.04 | NA | NA | 0.07 | 0.11 | 0.06 | 0.12 |
| Post-implementation | 0.16 | 0.10 | 0.25 | 0.06 | 0.07 | 0.10 | 0.07 | 0.11 |

**Table 2:** Measurement Uncertainty (MU) for HIV-1 (plasma and CSF), HBV and HCV with Panther® system in the pre-implementation and post-implementation time. (CSF: Cerebrospinal fluid)

|  |  | IQA | | | EQA | |
| --- | --- | --- | --- | --- | --- | --- |
|  |  | Number | Mean | CV% | Bias (%) | Z-score |
| HIV-1  plasma | High level | 72 | 5.35 | 4.92 | 3.61 | >3 |
| Low level | 72 | 3.01 | 1.84 | 3.94 | -0.61 |
| HIV-1  CSF | High level | 15 | 4.86 | 1.30 | 3.61 | >3 |
| Low level | 15 | 1.78 | 13.85 | 3.94 | -0.61 |
| HBV | High level | 36 | 4.50 | 2.35 | 2.86 | >3 |
| Low level | 36 | 2.81 | 1.19 | 0.98 | 0.21 |
| HCV | High level | 36 | 5.58 | 2.67 | 2.09 | 1.02 |
| Low level | 36 | 2.42 | 1.71 | 2.66 | -0.33 |

**Table 3:** Data from IQA and EQA for HIV-1 (plasma and CSF), HBV and HCV with Panther® system in the post-implementation time. (CV: coefficient of variation; CSF: Cerebrospinal fluid). All of the CV% conformed with the limit of 0.25 log applicable in our laboratory. According to the CTCB recommendations, a Z-score under 3 conforms. In our laboratory, three Z-score were over the limit of conformity. However, the small number of participants (n=5) explains the higher Z-score, without clinical significance and conformed with the CTCB. The units of the mean were in log copies/mL for HIV-1 parameter and in log IU/mL for HBV and HCV parameters.
